# Supplementary material for: Cd(II)/Mn(II)/Co(II)/Ni(II)/Zn(II) Coordination Polymers Built from Dicarboxylic Acid/Tetracarboxylic Acid Ligands: Their Structural Diversity and Fluorescence Properties
Source: MDPI journal article supplement (doi:10.3390/polym15071803), 2023-04-06
Supplement: s1 [file s1]

# **Cd(II)/Mn(II)/Co(II)/Ni(II)/Zn(II) Coordination Polymers Built from Dicarboxylic acid/Tetracarboxylic Acid Ligands: Their Structural diversity and Fluorescence properties**

**Lu Liu<sup>1</sup>, Jian-Min Li<sup>2</sup>, Meng-Di Zhang<sup>1</sup>, Hui-Jie Wang<sup>1</sup>, Ying Li<sup>1</sup>, Zhen-Bei Zhang<sup>1</sup>, Zi-Fang Zhao<sup>1</sup>, Yu Xi<sup>1</sup>, Yuan-Yuan Huang<sup>1</sup>, Jie Xu<sup>1</sup>, Bo Zhang<sup>1</sup>, Jun Chen<sup>1</sup> and Cheng-Xing Cui<sup>1,\*</sup>**

<sup>1</sup> *School of Chemistry and Chemical Engineering, Henan Institute of Science and Technology, Xinxiang, Henan, 453003, P. R. China*

<sup>2</sup> *School of Resources and Environment, Henan Institute of Science and Technology, Xinxiang, Henan, 453003, P. R. China*

\* Correspondence: chengxingcui@hist.edu.cn

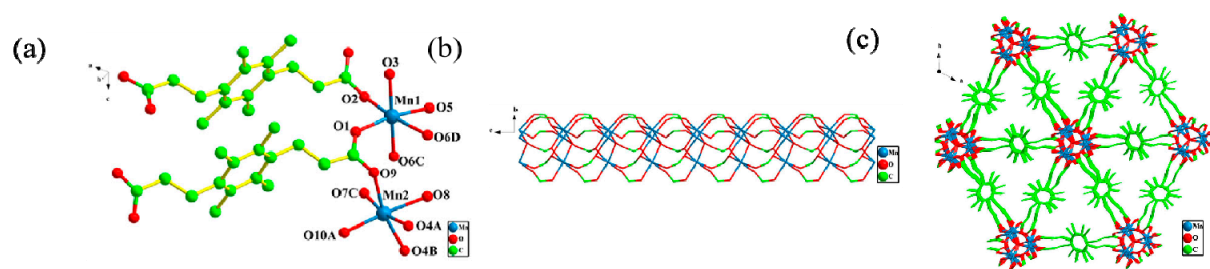

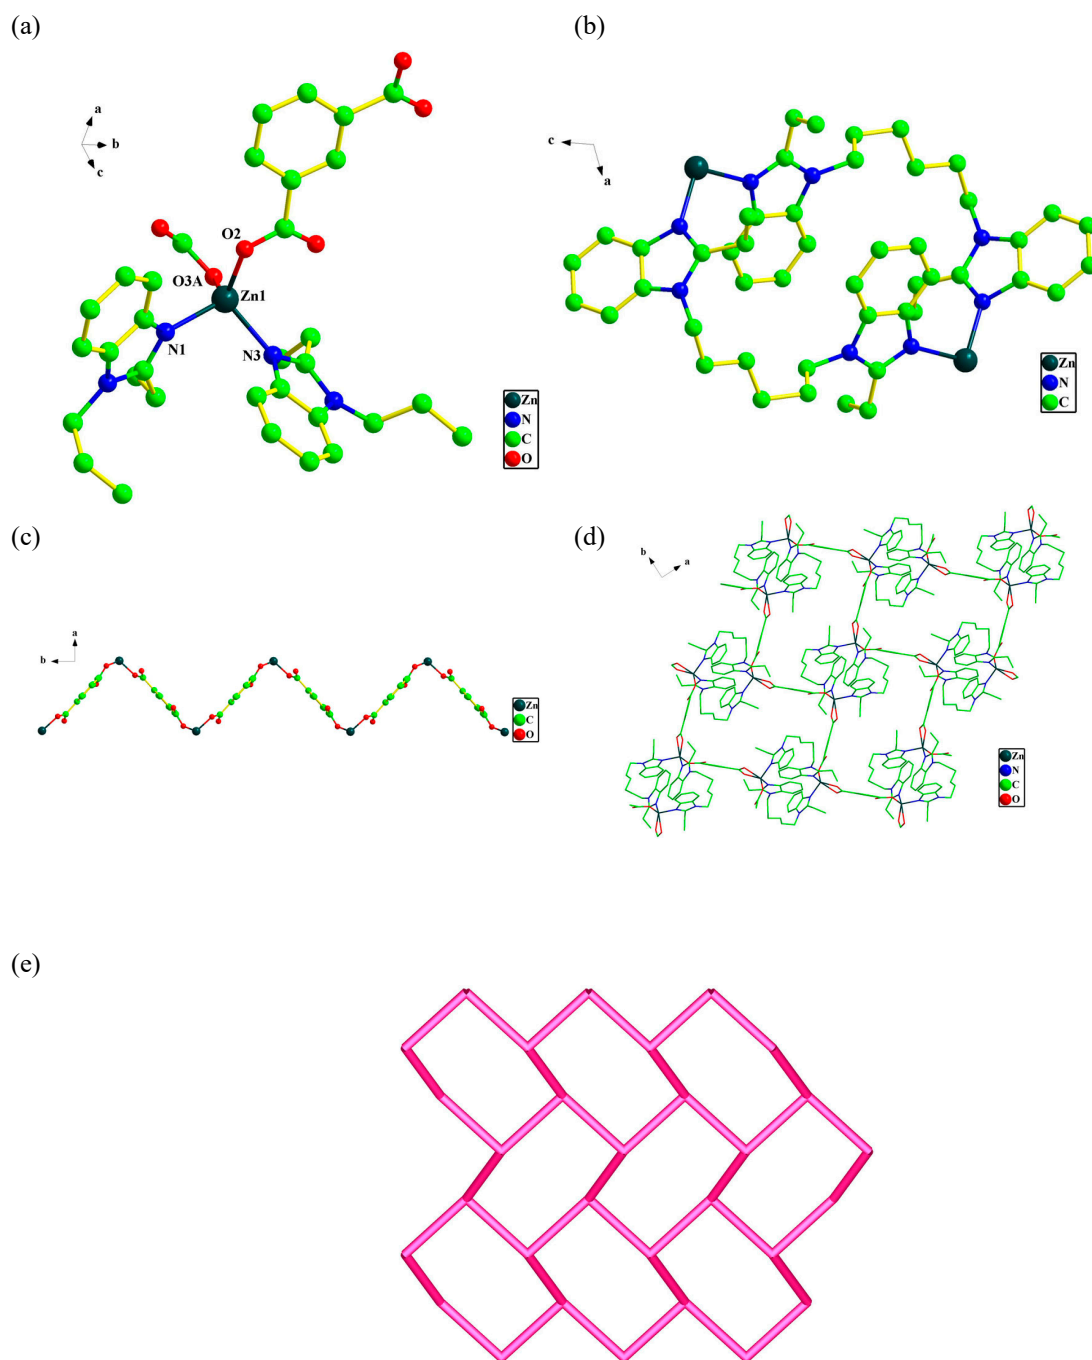

**Figure S2** (a) Coordination environment diagram around the Zn(II) center in **5**. (b) The 26-membered rings constructed by two bebiyh ligands and two Zn atoms. (c) 1D Zn/*m*-H<sub>2</sub>bdc chain. (d) 2D layer structure of **5**. (e) Schematic view of the 2D topology network for **5**.

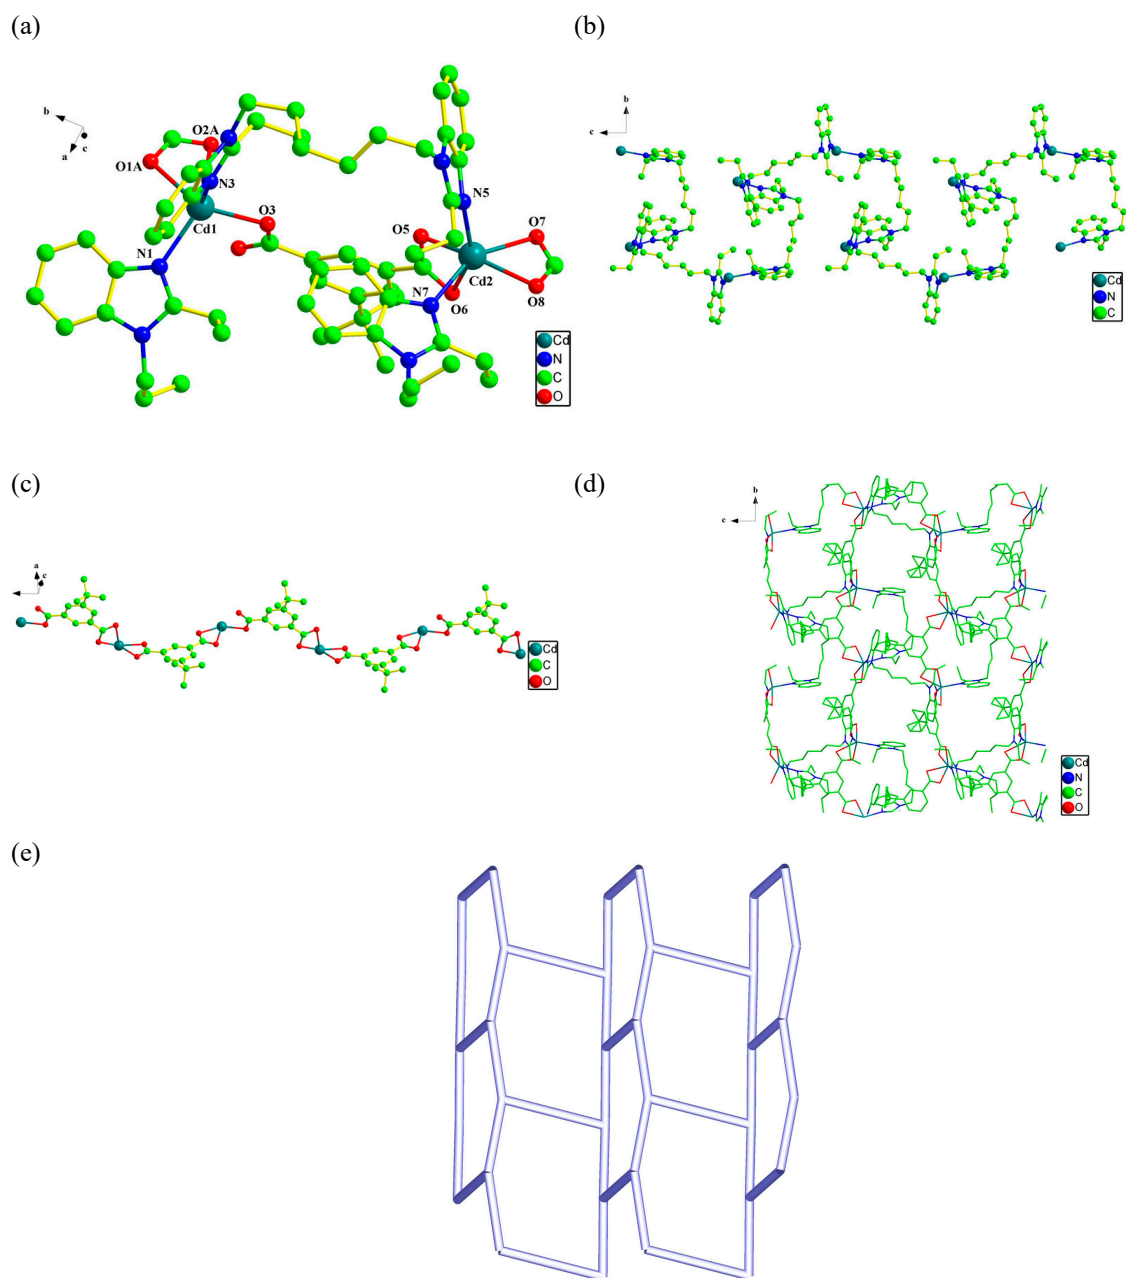

**Figure S3** (a) Coordination environment diagram around the Cd(II) center in **6**. (b) 1D Cd/bebiyh chain. (c) 1D Cd/5-tbia chain. (d) 2D layer structure of **6**. (e) Schematic view of the 2D topology network for **6**.

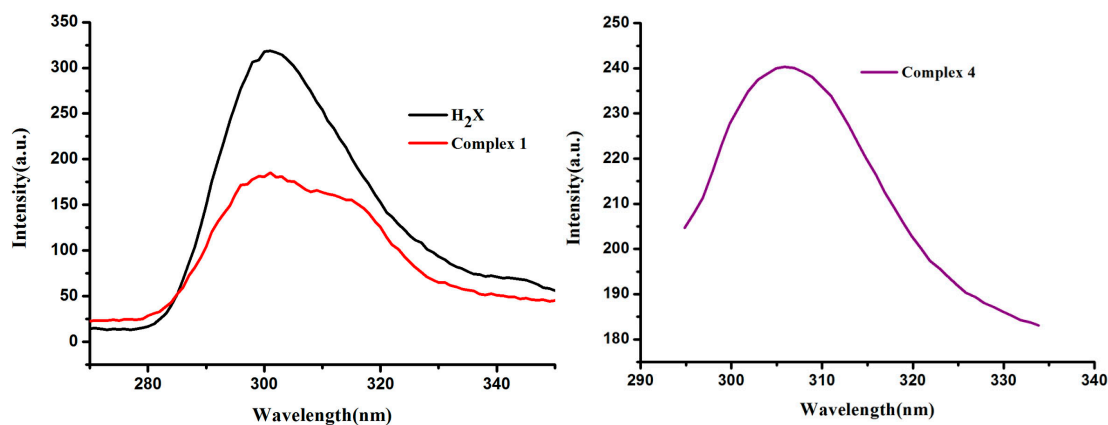

**Figure S4** Photoluminescent emission spectrum of the free  $H_2X$  ligand, complex 1 and 4.

### PXRD analysis of complex 1, 2 and 4

PXRD analysis was performed to check the purity of **1**, **2** and **4** (Figure S3). The peak positions of the as-synthesized sample were aligned with those simulated.

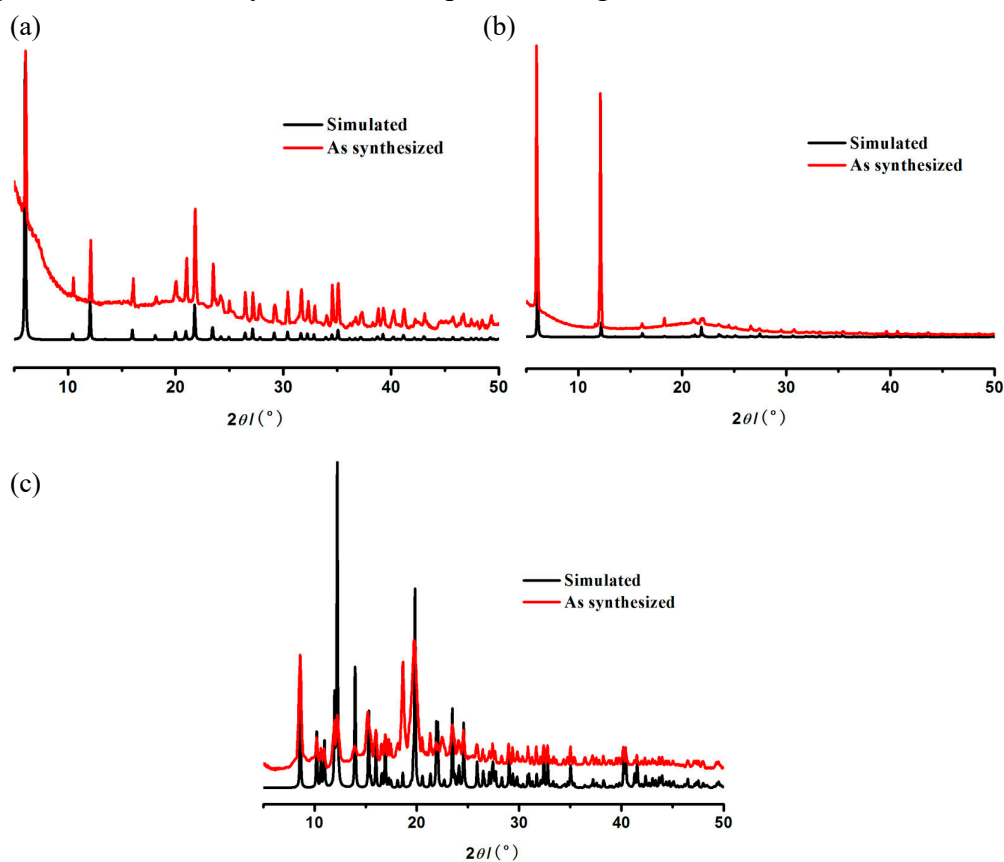

**Figure S5** Experimental (red) and simulated (black) PXRD patterns of complex **1**(a), **2**(b) and **4**(c).

**Table S1 Crystallographic data and structure refinement details for complex 1-6<sup>a,b</sup>**

| Complex                                                             | 1                                                                | 2                                                                | 3                                                                              | 4                                                                | 5                                                                | 6                                                                             |
|---------------------------------------------------------------------|------------------------------------------------------------------|------------------------------------------------------------------|--------------------------------------------------------------------------------|------------------------------------------------------------------|------------------------------------------------------------------|-------------------------------------------------------------------------------|
| formula                                                             | C <sub>96</sub> H <sub>120</sub> Cd <sub>6</sub> O <sub>26</sub> | C <sub>96</sub> H <sub>120</sub> Mn <sub>6</sub> O <sub>26</sub> | C <sub>48</sub> H <sub>54</sub> Co <sub>3</sub> N <sub>6</sub> O <sub>14</sub> | C <sub>26</sub> H <sub>40</sub> N <sub>2</sub> NiO <sub>10</sub> | C <sub>32</sub> H <sub>34</sub> N <sub>4</sub> O <sub>4</sub> Zn | C <sub>72</sub> H <sub>84</sub> Cd <sub>2</sub> N <sub>8</sub> O <sub>8</sub> |
| fw                                                                  | 2364.32                                                          | 2019.56                                                          | 1115.76                                                                        | 599.29                                                           | 604.00                                                           | 1414.27                                                                       |
| <i>T</i> /K                                                         | 293(2)                                                           | 293(2)                                                           | 293(2)                                                                         | 293(2)                                                           | 293(2)                                                           | 293(2)                                                                        |
| $\lambda$ (Mo K), Å                                                 | 0.71073                                                          | 0.71073                                                          | 0.71073                                                                        | 0.71073                                                          | 0.71073                                                          | 0.71073                                                                       |
| Cryst syst                                                          | Hexagonal                                                        | Rhombohedral                                                     | Monoclinic                                                                     | Monoclinic                                                       | Monoclinic                                                       | Orthorhombic                                                                  |
| Space group                                                         | <i>R</i> 3                                                       | <i>R</i> 3                                                       | <i>C</i> 2/ <i>c</i>                                                           | <i>P</i> 21/ <i>m</i>                                            | <i>P</i> 121/ <i>c</i> 1                                         | <i>P</i> na2(1)                                                               |
| a (Å)                                                               | 29.341(4)                                                        | 28.993(4)                                                        | 26.328(7)                                                                      | 8.9658(18)                                                       | 12.670(3)                                                        | 19.083(4)                                                                     |
| b (Å)                                                               | 29.341(4)                                                        | 28.993(4)                                                        | 8.7111(17)                                                                     | 16.111(3)                                                        | 14.144(3)                                                        | 17.919(4)                                                                     |
| c (Å)                                                               | 9.0195(18)                                                       | 9.000(15)                                                        | 25.620(8)                                                                      | 11.056(2)                                                        | 18.264(4)                                                        | 19.620(4)                                                                     |
| $\alpha$ (°)                                                        | 90                                                               | 90                                                               | 90                                                                             | 90                                                               | 90                                                               | 90                                                                            |
| $\beta$ (°)                                                         | 90                                                               | 90                                                               | 108.95(3)                                                                      | 111.80(3)                                                        | 109.92(3)                                                        | 90                                                                            |
| $\gamma$ (°)                                                        | 120                                                              | 120                                                              | 90                                                                             | 90                                                               | 90                                                               | 90                                                                            |
| V (Å <sup>3</sup> )                                                 | 6724.6(19)                                                       | 6552(11)                                                         | 5557(3)                                                                        | 1482.8(5)                                                        | 3077.4(12)                                                       | 6709(2)                                                                       |
| <i>Z</i>                                                            | 3                                                                | 3                                                                | 4                                                                              | 2                                                                | 4                                                                | 4                                                                             |
| <i>D</i> <sub>calcd.</sub> (g·cm <sup>-3</sup> )                    | 1.751                                                            | 1.536                                                            | 1.334                                                                          | 1.342                                                            | 1.304                                                            | 1.400                                                                         |
| abs coeff/mm <sup>-1</sup>                                          | 1.477                                                            | 0.922                                                            | 0.949                                                                          | 0.709                                                            | 0.839                                                            | 0.695                                                                         |
| <i>F</i> (000)                                                      | 3576                                                             | 3162                                                             | 2308                                                                           | 636                                                              | 1264                                                             | 2928                                                                          |
| $\theta/2\theta$ (°)                                                | 1.39-27.92( $\theta$ )                                           | 1.40-27.91                                                       | 2.48-25.50                                                                     | 2.35-25.49                                                       | 1.710-23.050( $\theta$ )                                         | 1.539-25.000( $\theta$ )                                                      |
| GOF                                                                 | 1.069                                                            | 0.985                                                            | 0.990                                                                          | 1.043                                                            | 1.077                                                            | 1.031                                                                         |
| <i>R</i> <sub>1</sub> ( <i>I</i> >2sigma( <i>I</i> )) <sup>a</sup>  | 0.0581                                                           | 0.0635                                                           | 0.0986                                                                         | 0.0872                                                           | 0.1187                                                           | 0.0482                                                                        |
| <i>wR</i> <sub>2</sub> ( <i>I</i> >2sigma( <i>I</i> )) <sup>b</sup> | 0.1288                                                           | 0.1599                                                           | 0.2293                                                                         | 0.1804                                                           | 0.3448                                                           | 0.1235                                                                        |

$$^a R_1 = \sum ||F_o| - |F_c|| / \sum |F_o|. \quad ^b wR_2 = [\sum w(F_o^2 - F_c^2)^2 / \sum w(F_o^2)^2]^{1/2}.$$

**Table S2 Selected Bond Lengths (Å) and Bond Angles (deg) for 1-6<sup>a</sup>**

| Complex 1            |            |                      |            |                      |            |
|----------------------|------------|----------------------|------------|----------------------|------------|
| Cd(1)-O(3)           | 2.190(3)   | Cd(1)-O(1)           | 2.194(6)   | Cd(1)-O(2)           | 2.247(5)   |
| Cd(1)-O(5)#2         | 2.384(6)   | Cd(1)-O(4)           | 2.419(6)   | Cd(1)-O(5)           | 2.436(6)   |
| Cd(2)-O(7)           | 2.210(6)   | Cd(2)-O(6)#3         | 2.219(6)   | Cd(2)-O(9)           | 2.219(3)   |
| Cd(2)-O(10)          | 2.396(6)   | Cd(2)-O(10)#2        | 2.400(6)   | Cd(2)-O(8)#3         | 2.451(6)   |
| O(3)-Cd(1)-O(1)      | 168.5(2)   | O(3)-Cd(1)-O(2)      | 101.4(2)   | O(1)-Cd(1)-O(2)      | 89.6(2)    |
| O(3)-Cd(1)-O(5)#2    | 78.1(2)    | O(1)-Cd(1)-O(5)#2    | 103.3(2)   | O(2)-Cd(1)-O(5)#2    | 100.5(2)   |
| O(3)-Cd(1)-O(4)      | 89.1(2)    | O(1)-Cd(1)-O(4)      | 89.0(2)    | O(2)-Cd(1)-O(4)      | 83.0(2)    |
| O(5)#2-Cd(1)-O(4)    | 167.17(19) | O(3)-Cd(1)-O(5)      | 77.0(2)    | O(1)-Cd(1)-O(5)      | 91.5(2)    |
| O(2)-Cd(1)-O(5)      | 169.3(2)   | O(5)#2-Cd(1)-O(5)    | 89.6(3)    | O(4)-Cd(1)-O(5)      | 86.3(2)    |
| O(7)-Cd(2)-O(6)#3    | 88.8(2)    | O(7)-Cd(2)-O(9)      | 170.9(2)   | O(6)#3-Cd(2)-O(9)    | 99.9(2)    |
| O(7)-Cd(2)-O(10)     | 103.5(2)   | O(9)-Cd(2)-O(10)     | 77.9(2)    | O(6)#3-Cd(2)-O(10)#2 | 169.2(2)   |
| O(6)#3-Cd(2)-O(10)   | 99.7(2)    | O(7)-Cd(2)-O(10)#2   | 93.2(2)    | O(9)-Cd(2)-O(10)#2   | 77.8(2)    |
| O(10)-Cd(2)-O(10)#2  | 90.1(3)    | O(7)-Cd(2)-O(8)#3    | 89.0(2)    | O(6)#3-Cd(2)-O(8)#3  | 83.7(2)    |
| O(9)-Cd(2)-O(8)#3    | 89.20(19)  | O(10)-Cd(2)-O(8)#3   | 167.01(19) | O(10)#2-Cd(2)-O(8)#3 | 85.77(19)  |
| Complex 2            |            |                      |            |                      |            |
| Mn(1)-O(1)           | 2.116(4)   | Mn(1)-O(5)           | 2.153(3)   | Mn(1)-O(3)           | 2.160(4)   |
| Mn(1)-O(2)           | 2.220(4)   | Mn(1)-O(6)#1         | 2.277(4)   | Mn(1)-O(6)#2         | 2.321(4)   |
| Mn(2)-O(10)#3        | 2.121(4)   | Mn(2)-O(7)#2         | 2.137(4)   | Mn(2)-O(8)           | 2.218(3)   |
| Mn(2)-O(9)           | 2.244(4)   | Mn(2)-O(4)#4         | 2.263(4)   | Mn(2)-O(4)#3         | 2.281(4)   |
| O(1)-Mn(1)-O(5)      | 169.83(17) | O(1)-Mn(1)-O(3)      | 93.73(16)  | O(5)-Mn(1)-O(3)      | 96.38(17)  |
| O(1)-Mn(1)-O(2)      | 92.74(15)  | O(5)-Mn(1)-O(2)      | 89.36(14)  | O(3)-Mn(1)-O(2)      | 84.55(16)  |
| O(1)-Mn(1)-O(6)#1    | 99.15(15)  | O(5)-Mn(1)-O(6)#1    | 78.24(15)  | O(3)-Mn(1)-O(6)#1    | 98.57(15)  |
| O(2)-Mn(1)-O(6)#1    | 167.45(13) | O(3)-Mn(1)-O(6)#2    | 168.56(13) | O(10)#3-Mn(2)-O(7)#2 | 92.83(17)  |
| O(1)-Mn(1)-O(6)#2    | 92.95(15)  | O(2)-Mn(1)-O(6)#2    | 85.87(15)  | O(10)#3-Mn(2)-O(8)   | 172.91(18) |
| O(5)-Mn(1)-O(6)#2    | 77.27(15)  | O(6)#1-Mn(1)-O(6)#2  | 89.52(19)  | O(7)#2-Mn(2)-O(8)    | 94.25(17)  |
| O(10)#3-Mn(2)-O(9)   | 92.87(16)  | O(7)#2-Mn(2)-O(4)#4  | 98.04(15)  | O(7)#2-Mn(2)-O(4)#3  | 167.71(13) |
| O(7)#2-Mn(2)-O(9)    | 84.65(15)  | O(8)-Mn(2)-O(4)#4    | 78.07(15)  | O(8)-Mn(2)-O(4)#3    | 77.70(16)  |
| O(8)-Mn(2)-O(9)      | 87.97(14)  | O(9)-Mn(2)-O(4)#4    | 165.92(13) | O(9)-Mn(2)-O(4)#3    | 85.79(15)  |
| O(10)#3-Mn(2)-O(4)#4 | 100.76(15) | O(10)#3-Mn(2)-O(4)#3 | 95.34(16)  | O(4)#4-Mn(2)-O(4)#3  | 89.44(19)  |
| Complex 3            |            |                      |            |                      |            |
| Co(1)-O(3)#1         | 2.054(5)   | Co(1)-N(3)           | 2.170(6)   | Co(2)-O(7)#2         | 2.105(6)   |
| Co(1)-O(2)           | 2.084(5)   | Co(1)-N(1)           | 2.184(6)   | Co(2)-O(7)           | 2.105(6)   |
| Co(1)-O(4)#1         | 2.124(5)   | Co(2)-O(6)#2         | 2.112(7)   | Co(2)-N(2)           | 2.176(7)   |
| Co(1)-O(1)           | 2.159(6)   | Co(2)-O(6)           | 2.112(7)   | Co(2)-N(2)#2         | 2.176(7)   |
| O(3)#1-Co(1)-O(2)    | 82.3(2)    | O(4)#1-Co(1)-O(1)    | 100.6(2)   | O(3)#1-Co(1)-N(1)    | 95.7(2)    |
| O(3)#1-Co(1)-O(4)#1  | 85.9(2)    | O(3)#1-Co(1)-N(3)    | 96.2(2)    | O(2)-Co(1)-N(1)      | 96.4(2)    |
| O(2)-Co(1)-O(4)#1    | 167.6(2)   | O(2)-Co(1)-N(3)      | 91.2(2)    | O(4)#1-Co(1)-N(1)    | 88.6(2)    |
| O(3)#1-Co(1)-O(1)    | 172.8(3)   | O(4)#1-Co(1)-N(3)    | 86.2(2)    | O(1)-Co(1)-N(1)      | 81.6(2)    |
| O(2)-Co(1)-O(1)      | 91.3(3)    | O(1)-Co(1)-N(3)      | 87.2(2)    | N(3)-Co(1)-N(1)      | 166.6(3)   |

|                     |            |                     |            |                     |           |
|---------------------|------------|---------------------|------------|---------------------|-----------|
| O(6)#2-Co(2)-O(6)   | 180.0(4)   | O(6)#2-Co(2)-O(7)#2 | 91.8(3)    | O(6)-Co(2)-N(2)     | 89.7(3)   |
| O(6)#2-Co(2)-O(7)   | 88.2(3)    | O(6)-Co(2)-O(7)     | 91.8(3)    | O(7)#2-Co(2)-N(2)   | 91.4(3)   |
| O(7)#2-Co(2)-O(7)   | 180.0(6)   | O(6)#2-Co(2)-N(2)   | 90.3(3)    | O(7)-Co(2)-N(2)     | 88.6(3)   |
| O(6)#2-Co(2)-N(2)#2 | 89.7(3)    | O(6)-Co(2)-N(2)#2   | 90.3(3)    | O(7)#2-Co(2)-N(2)#2 | 88.6(3)   |
| O(7)-Co(2)-N(2)#2   | 91.4(3)    | N(2)-Co(2)-N(2)#2   | 180.0(3)   |                     |           |
| Complex 4           |            |                     |            |                     |           |
| Ni(1)-O(1)#1        | 2.085(3)   | Ni(1)-O(1)          | 2.085(3)   | Ni(1)-O(3)          | 2.086(4)  |
| Ni(1)-N(2)#2        | 2.129(5)   | Ni(1)-N(1)          | 2.117(5)   | Ni(1)-O(3)#1        | 2.086(3)  |
| O(1)#1-Ni(1)-O(1)   | 84.88(19)  | O(1)#1-Ni(1)-O(3)   | 175.33(14) | O(3)-Ni(1)-N(1)     | 91.55(15) |
| O(1)-Ni(1)-O(3)     | 90.45(14)  | O(1)#1-Ni(1)-O(3)#1 | 90.45(14)  | O(3)#1-Ni(1)-N(1)   | 91.55(15) |
| O(1)-Ni(1)-O(3)#1   | 175.33(14) | O(3)-Ni(1)-O(3)#1   | 94.2(2)    | O(1)#1-Ni(1)-N(2)#2 | 91.23(15) |
| O(1)#1-Ni(1)-N(1)   | 88.47(15)  | O(1)-Ni(1)-N(1)     | 88.47(15)  | O(1)-Ni(1)-N(2)#2   | 91.23(15) |
| O(3)-Ni(1)-N(2)#2   | 88.73(14)  | O(3)#1-Ni(1)-N(2)#2 | 88.73(14)  | N(1)-Ni(1)-N(2)#2   | 179.6(2)  |
| Complex 5           |            |                     |            |                     |           |
| Zn(1)-N(1)          | 2.093(10)  | Zn(1)-N(3)          | 2.081(8)   | Zn(1)-O(2)          | 1.980(8)  |
| Zn(1)-O(3)#1        | 1.980(8)   | N(3)-Zn(1)-N(1)     | 101.8(4)   | O(2)-Zn(1)-N(1)     | 106.5(4)  |
| O(2)-Zn(1)-N(3)     | 112.7(4)   | O(3)#1-Zn(1)-N(1)   | 112.4(3)   | O(3)#1-Zn(1)-N(3)   | 108.0(3)  |
| O(3)#1-Zn(1)-O(2)   | 114.8(4)   |                     |            |                     |           |
| Complex 6           |            |                     |            |                     |           |
| Cd(1)-N(1)          | 2.300(7)   | Cd(1)-N(3)          | 2.308(8)   | Cd(1)-O(1)#1        | 2.245(6)  |
| Cd(1)-O(2)#1        | 2.581(7)   | Cd(1)-O(3)          | 2.191(6)   | Cd(2)-N(5)          | 2.313(7)  |
| Cd(2)-N(7)          | 2.311(7)   | Cd(2)-O(5)          | 2.218(6)   | Cd(2)-O(6)          | 2.607(6)  |
| Cd(2)-O(7)          | 2.495(6)   | Cd(2)-O(8)          | 2.242(7)   | N(1)-Cd(1)-N(3)     | 106.3(3)  |
| N(1)-Cd(1)-O(2)#1   | 138.8(3)   | N(3)-Cd(1)-O(2)#1   | 108.1(3)   | O(1)#1-Cd(1)-N(1)   | 99.1(2)   |
| O(1)#1-Cd(1)-N(3)   | 99.8(3)    | O(1)#1-Cd(1)-O(2)#1 | 53.2(2)    | O(3)-Cd(1)-N(1)     | 110.0(3)  |
| O(3)-Cd(1)-N(3)     | 91.6(3)    | O(3)-Cd(1)-O(1)#1   | 144.3(3)   | O(3)-Cd(1)-O(2)#1   | 91.2(2)   |
| N(5)-Cd(2)-O(6)     | 150.2(2)   | N(5)-Cd(2)-O(7)     | 106.4(2)   | N(7)-Cd(2)-N(5)     | 96.8(3)   |
| N(7)-Cd(2)-O(6)     | 87.3(2)    | N(7)-Cd(2)-O(7)     | 150.6(2)   | O(5)-Cd(2)-N(5)     | 96.5(2)   |
| O(5)-Cd(2)-N(7)     | 93.5(2)    | O(5)-Cd(2)-O(6)     | 53.8(2)    | O(5)-Cd(2)-O(7)     | 101.3(2)  |
| O(5)-Cd(2)-O(8)     | 146.6(3)   | O(7)-Cd(2)-O(6)     | 81.4(2)    | O(8)-Cd(2)-N(5)     | 111.7(3)  |
| O(8)-Cd(2)-N(7)     | 100.2(3)   | O(8)-Cd(2)-O(6)     | 96.4(3)    | O(8)-Cd(2)-O(7)     | 54.8(2)   |

<sup>a</sup> Symmetry transformations used to generate equivalent atoms in complex (1): #2 -y+1,x-y,z; #3 x,y,z+1. (2) #1 -y+1/3,x-y-1/3,z-1/3; #2 -x+y+1/3,-x+2/3,z-1/3; #3 x,y,z+1; #4 -y,x-y,z+1; #5 -x+y,-x,z-1. (3) #1 -x+1/2,y+1/2,-z+1/2; #2 -x+1,-y,-z; (4): #1 x,-y+1/2,z; #2 x+1,y,z+1. (5): #1 -x+1,y-1/2,-z+1/2. (6): #1 x,y+1,z.
